# Supplementary material for: Rapid Microfluidic Mixer Based on Ferrofluid and Integrated Microscale NdFeB-PDMS Magnet
Source: MDPI journal article supplement (doi:10.3390/mi11010029), 2019-12-25
Supplement: s1 [file s1]

## Supplementary Material

# Rapid Microfluidic Mixer Based on Ferrofluid and Integrated Microscale NdFeB-PDMS Magnet

Ran Zhou <sup>1,\*</sup>, Athira N Surendran<sup>1</sup>, Marcel Mejulu<sup>1</sup> and Yang Lin<sup>2</sup>

<sup>1</sup> Department of Mechanical and Civil Engineering, Purdue University Northwest, Hammond, IN 46321, USA;

<sup>2</sup> Department of Mechanical and Industrial Engineering, University of Illinois at Chicago, Chicago, IL 60607, USA.

\* Correspondence: zhou970@pnw.edu

### CFD simulation modeling details:

The modeling strategy consists of two steps: 1) simulation of the DC magnetic field using FEMM based on the micro-magneto configurations; 2) import the magnetic flux intensity field from the FEMM simulation results into the CFD model and perform the coupled laminar flow and MHD simulations for the mixture. A 2-D steady-state CFD model is developed to simulate the mixing process, with the following configuration:

- Both water and ferrofluid adopt constant molecular viscosities and densities, but the viscosity and density of the mixture vary based on the local ferrofluid concentration.
- The computational mesh consists of 0.2 million quadrilateral cells for the 2-D model.
- Ferrofluid concentration is treated as a passive scalar solved via a user-defined scalar (UDS).
- Magnetic forces are incorporated into the momentum equations as source terms through the user-defined functions (UDF)
- For boundary conditions (B.C.):
  - Velocity inlet B.C. is used for both water and ferrofluid;
  - Pressure outlet B.C. is adopted at channel outlet, with a total pressure of 1 atm;
  - No-slip B.C. is used for all the channel walls (zero velocities and zero gradient for pressure and UDS).
